# Supplementary material for: Age-dependent pattern of cerebellar susceptibility to bilirubin neurotoxicity in vivo in mice
Source: PubMed Central journal article supplement (PMC4142726; doi:10.1242/dmm.016535), 2014-07-25
Supplement: supp_7.9.1057_DMM016535.pdf [file supp_7.9.1057_DMM016535.pdf]

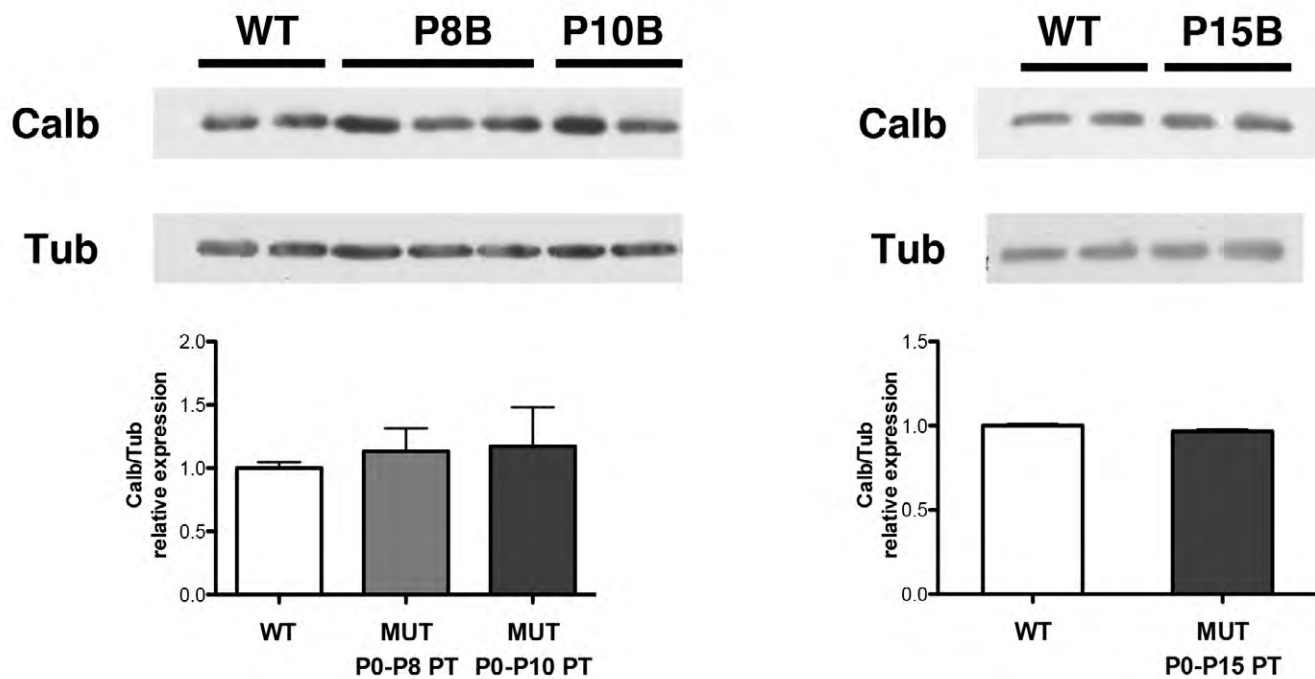

**Supplementary Fig. 1. Western blot analysis of total cerebellum protein extracts using an anti-calbindin1 antibody in P15 WT and PT-treated mutant mice.** Tubulin was used as a loading control. Lower panel: densitometric quantification of the bands. ML, molecular layer; IGL, internal granular layer.

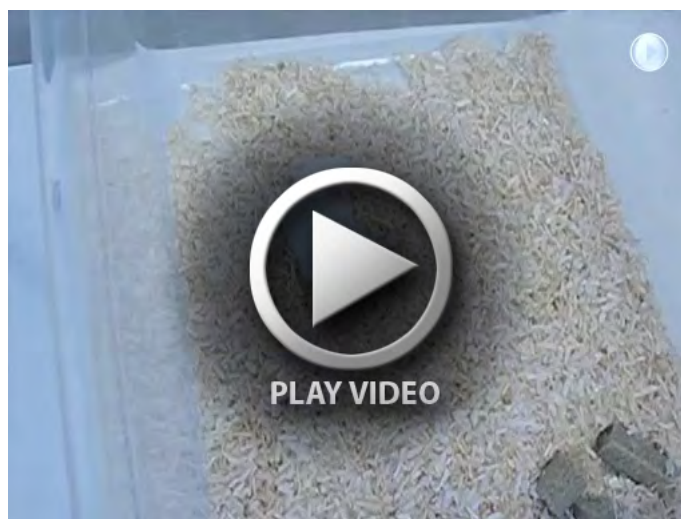

**Movie 1. Untreated FVB/NJ-Ugt1<sup>-/-</sup> at P12 showing features of bilirubin encephalopathy such as lethargy, dystonia and seizures.**

| Genetic Background | Post natal day | Ugt1 allele    |                 |
|--------------------|----------------|----------------|-----------------|
|                    |                | WT             | MUT             |
| C57Bl/6            | P2             | 0.2 ± 0.1 (8)  | 11.8 ± 2.2 (6)  |
|                    | P5             | 0.2 ± 0.1 (9)  | 12.9 ± 1.7 (10) |
| FVB/NJ             | P2             | 0.3 ± 0.09 (5) | 8.8 ± 0.9 (3)   |
|                    | P5             | 0.2 ± 0.02 (4) | 10.4 ± 0.5 (8)  |
|                    | P8             | 0.2 ± 0.08 (7) | 12.5 ± 0.9 (8)  |
|                    | P10            | 0.2 ± 0.1 (5)  | 14.4 ± 0.8 (3)  |

**Supplementary Table 1. Total plasma bilirubin levels in C57Bl/6 & FVB/NJ mice.** Values represent means±SD. Values in parenthesis indicate number of samples analysed.
